# Supplementary material for: Identification of the genecluster involved in muraymycin biosynthesis from Streptomyces sp. NRRL 30471
Source: Royal Society of Chemistry journal article supplement (doi:10.1039/c0mb00237b), 2010-12-23
Supplement: c0mb00237b.pdf [file c0mb00237b.pdf]

## Identification of the Gene Cluster Involved in Muraymycins

### Biosynthesis from *Streptomyces* sp. NRRL 30471

Lin Cheng,<sup>a</sup> Wenqing Chen,<sup>a,b,\*</sup> Lipeng Zhai,<sup>a</sup> Dongmei Xu,<sup>a</sup> Tingting Huang,<sup>a</sup> Shuangjun Lin,<sup>a</sup>  
Xiufen Zhou,<sup>a</sup> Zixin Deng<sup>a,b,\*</sup>

<sup>a</sup>Laboratory of Microbial Metabolism, and School of Life Sciences & Biotechnology,  
Shanghai Jiao Tong University, Shanghai 200030, China

<sup>b</sup>College of Pharmacy, Wuhan University, Wuhan 430072, China

**Table S1. Strains and plasmids used in this study**

| Strain/phage/<br>plasmid                      | Relevant characteristics                                                                                                                                                     | Reference or source             |
|-----------------------------------------------|------------------------------------------------------------------------------------------------------------------------------------------------------------------------------|---------------------------------|
| <b><i>Streptomyces</i> sp.<br/>NRRL 30471</b> |                                                                                                                                                                              |                                 |
| 30471                                         | Wild-type strain producing muraymycins                                                                                                                                       | NRRL                            |
| CL-1                                          | The <i>ca.</i> 0.5-kb fragment of <i>mur16</i> gene in 30471 was replaced by 1.5-kb of <i>neo</i> cassette of SuperCos1                                                      | This study<br>(Figure. S1)      |
| CL-2                                          | The <i>ca.</i> 0.9-kb of <i>mur17</i> gene of 30471 was replaced by 1.5-kb of <i>neo</i> cassette of SuperCos1                                                               | This study<br>(Figure. S1)      |
| <b><i>E. coli</i></b>                         |                                                                                                                                                                              |                                 |
| DH10B                                         | F <sup>-</sup> <i>mcrA</i> Δ ( <i>mrr-hsdRMS-mcrBC</i> ) φ80d <i>lacZ</i> Δ<br>M15 Δ <i>lacX74 deoR recA1 endA1 araΔ139 D(ara, leu)1697 galU galKλ<sup>-</sup> rpsL nupG</i> | GIBCO BRL                       |
| EPI300-T1R                                    | Host cell for construction of genomic cosmid library                                                                                                                         | EPICENTER                       |
| BW25113<br>(pIJ790)                           | BW25113/pIJ790 K-12 derivative: Δ <i>araBAD</i><br>Δ <i>rhaBAD</i> /λ-Red( <i>gam bet exo</i> ) <i>cat araC rep101</i> (Ts)                                                  | <sup>1</sup>                    |
| ET12567<br>(pUZ8002)                          | <i>dam dcm hsdS</i> pUZ8002                                                                                                                                                  | <sup>2</sup>                    |
| <b><i>Bacillus subtilis</i></b>               | Indicator strain sensitive to muraymycins                                                                                                                                    | ( Lab collection )              |
| <b>Plasmids</b>                               |                                                                                                                                                                              |                                 |
| pOJ446                                        | <i>aa (3)I V, SCP2, rep<sup>pMB1*</sup>, attΦC31, oriT</i>                                                                                                                   | <sup>3</sup>                    |
| pSET152                                       | <i>aa (3)I V, lacZ, rep<sup>pMB1*</sup> attΦC31, oriT</i>                                                                                                                    | <sup>3</sup>                    |
| pJTU2463                                      | A derivative of pOJ446 with SCP2 replicon replaced by <i>int</i> and <i>attP</i> from pSET152                                                                                | (Yao <i>et al.</i> unpublished) |

|           |                                                                                                                  |            |
|-----------|------------------------------------------------------------------------------------------------------------------|------------|
| pJTU2463b | A derivative of pJTU2463 with XbaI and SpeI sites blocked (Chen <i>et al.</i> unpublished)                       |            |
| SuperCos1 | <i>neo, bla, cos, ori</i> <sup>pUC</sup>                                                                         | Stratagene |
| pJTU5622  | A ca. 8 kb ScaI fragment (Fig. 2) from cosmid 18F3 was cloned into the EcoRV site of pOJ446                      | This study |
| pJTU5627  | A ca. 0.5-kb fragment of <i>mur16</i> gene was replaced with 1.5-kb of <i>neo</i> cassette gene by PCR-targeting | This study |
| pJTU5628  | A ca. 0.9-kb fragment of <i>mur17</i> gene was replaced with 1.5-kb of <i>neo</i> cassette by PCR-targeting      | This study |

*oriT*, origin of transfer of plasmid RK2; *aac(3)IV*, apramycin resistance gene; *cat*, chloramphenicol resistance gene; *neo*, Neomycin resistance gene; *rep*<sup>pMB1\*</sup>, mutated *rep*<sup>pMB1</sup>.

**Table S2. PCR primers used in this study**

| Primers          | Sequence                                                                  |
|------------------|---------------------------------------------------------------------------|
| cpz14degenerate1 | 5'-- CGACTTG TACAACCGSTAYTTYTTC --3'                                      |
| cpz14degenerate2 | 5'-- GGAAGGTCTTGTGSGTSGAKCKCC --3'                                        |
| 16F              | 5'-- GAAGTGAACGACGTCGTACGTTACCGATACGGCGCCGCT<br>TCTAGAGCTATTCCAGAAGT --3' |
| 16R              | 5'-- GACGTCATTGCGGAAGATCAATGCCTCGCCCGCTCCCAG<br>ACTAGTCTGGATGCCGACG --3'  |
| 16A              | 5'-- TACCATATGGTGCTCCCTGGACCGGGTAG--3'                                    |
| 16B              | 5'-- ATCAAGCTTCTAGATCAGGGGCTCTCCAGGTAGAG--3'                              |
| 17F              | 5'-- CTGTTGGCGCTCCTCGGCGAGATCGAGAAGGAACAGCGC<br>TCTAGAGCTATTCCAGAAG--3'   |
| 17R              | 5'-- CCCGAGGCGGAGCGCCGGTTCGGGATGTCGGGGAGCTC<br>ACTAGTCTGGATGCCGACG--3'    |
| 17A              | 5'-- TACCATATGACCTCTTCGGACGACTGC--3'                                      |
| 17B              | 5'-- ATTGAATTCAGCCATGGAAGAGTCCGG--3'                                      |

S, C/G; Y, C/T; K, T/G.

### Figure Legends

**Figure S1:** The corresponding conserved amino acids positions of cpz14degenerate1 and cpz14degenerate2 in Cpz14 and its homologs. Cpz14, BAI23322, AF484556\_32 and YP\_632761 are proteins from *Streptomyces* sp. MK730-62F2, *S. griseus*, *S. atroolivaceus* and *M. xanthus* DK 1622 respectively.

**Figure S2:** PCR Identification of the CL-1 ( $\Delta mur16$ ) and CL-2 ( $\Delta mur17$ ) Mutants of *Streptomyces* sp. NRRL 30471. **A**, PCR identification of *mur16* mutation in NRRL 30471, as *ca.* 0.5-kb of *mur16* gene was replaced by *ca.* 1.5-kb *neo* cassette, the resultant *mur16* mutant produces 1.8-kb PCR product (Lane 1), and the intact *mur16* gives a PCR product of 0.8-kb (Lane 2). **B**, PCR confirmation of *mur17* mutation in NRRL 30471, as *ca.* 0.9-kb of *mur17* gene was replaced by *ca.* 1.5-kb *neo* cassette, the resultant *mur17* mutant produces 1.9-kb PCR product, while the intact *mur17* gives a PCR product of *ca.* 1.3-kb.

**Figure S3:** MS and MS/MS Analysis of the muraymycin D1 and C1 components from wild-type. **A**, MS and MS/MS analysis of the muraymycin D1 component. The component generated a  $[M+H]^+$  ion at  $m/z$  930.4, which was fragmented into main ions of 462.2, 668.2, 813.3 and 912.4, *etc.* **B**, MS and MS/MS analysis of the muraymycin C1 component. The component generated a  $[M+H]^+$  ion at  $m/z$  946.4, which was fragmented into main ions of 442.2, 684.2, 829.3 and 928.4, *etc.* **C**, MS/MS Fragmentation pattern of the muraymycin D1. **D**, MS/MS Fragmentation pattern of the muraymycin C1.

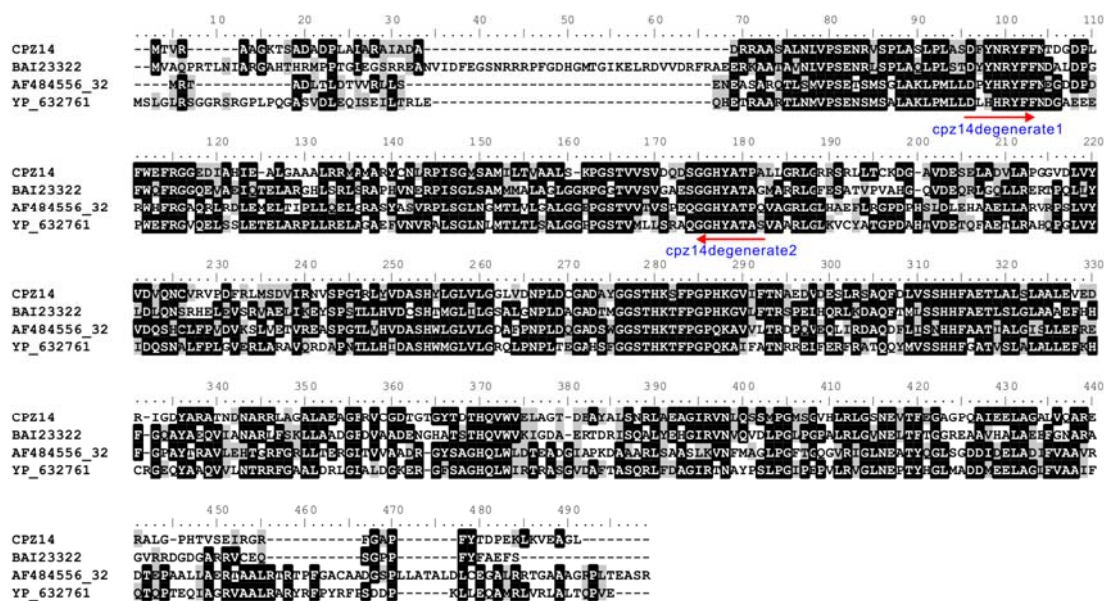

Figure S1

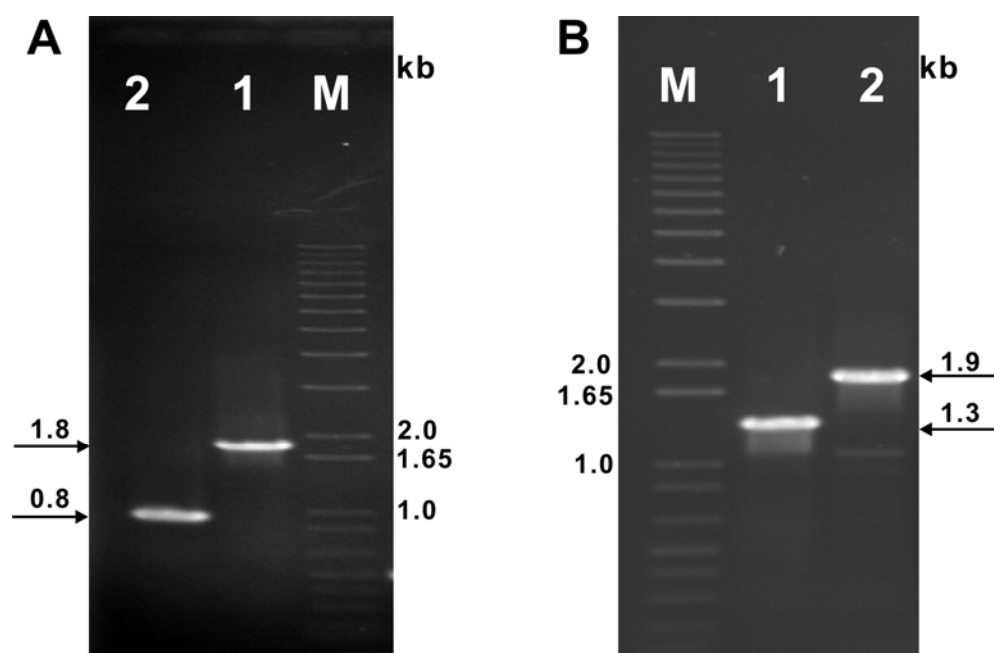

Figure S2

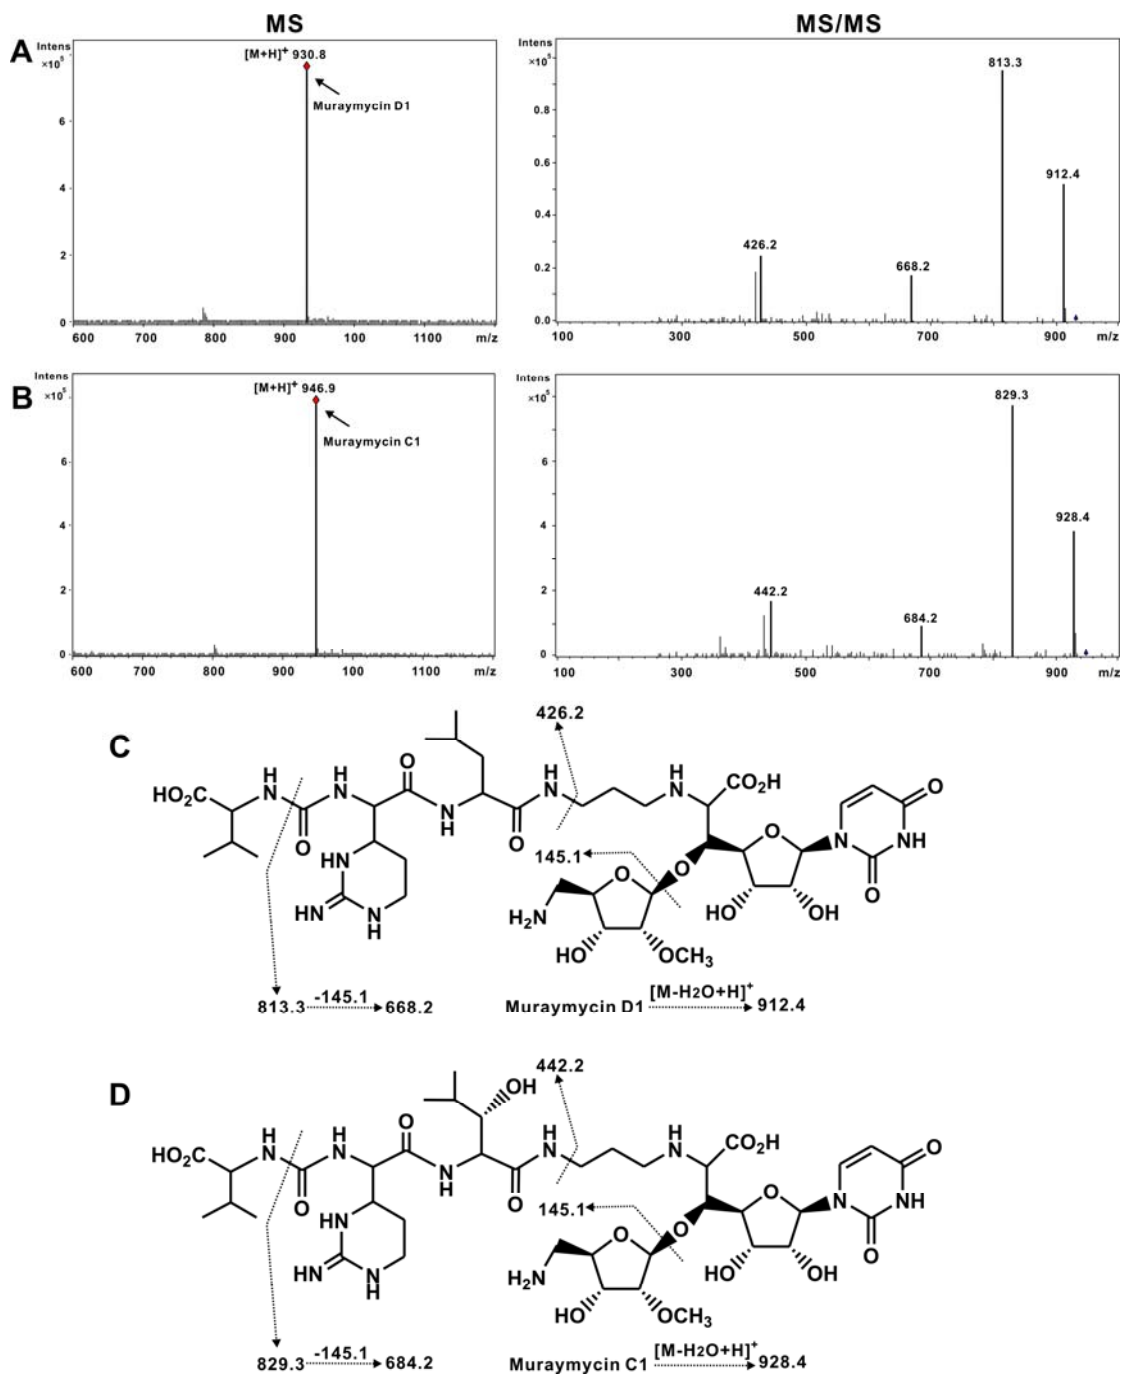

**Figure S3**

### References

1. B. Gust, G. L. Challis, K. Fowler, T. Kieser and K. F. Chater, *Proceedings of the National Academy of Sciences of the United States of America*, 2003, **100**, 1541-1546.
2. M. S. Paget, L. Chamberlin, A. Atrih, S. J. Foster and M. J. Buttner, *Journal of bacteriology*, 1999, **181**, 204-211.
3. M. Bierman, R. Logan, K. O'Brien, E. T. Seno, R. N. Rao and B. E. Schoner, *Gene*, 1992, **116**, 43-49.
